# Supplementary material for: Knowledge, Attitude, and Perception of Cancer Patients towards COVID-19 in Pakistan: A Cross-Sectional Study
Source: MDPI journal article supplement (doi:10.3390/ijerph19137926), 2022-06-28
Supplement: s1 [file s1]

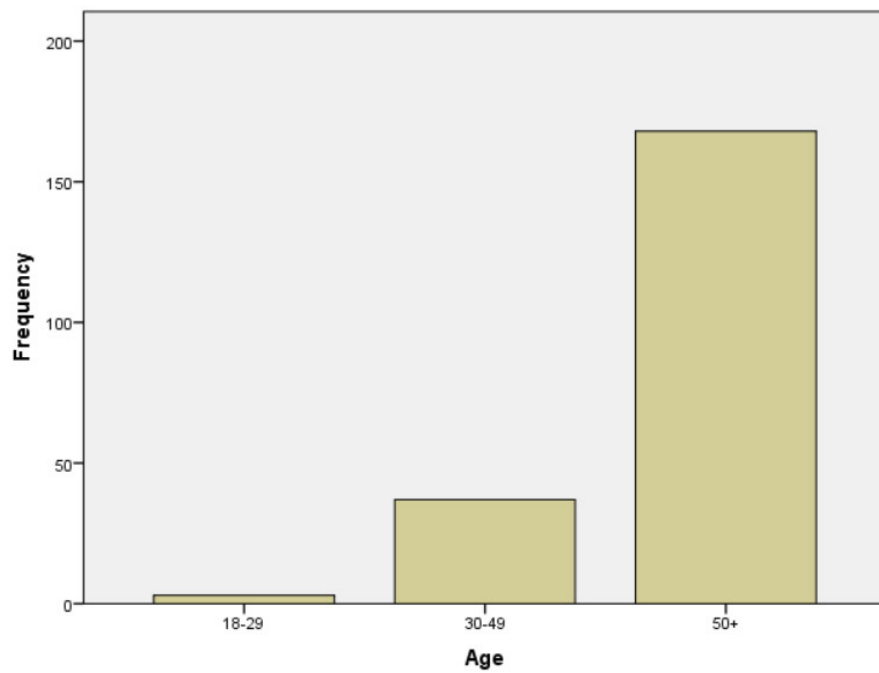

**Figure S1: Age-wise status of sample cohort.**

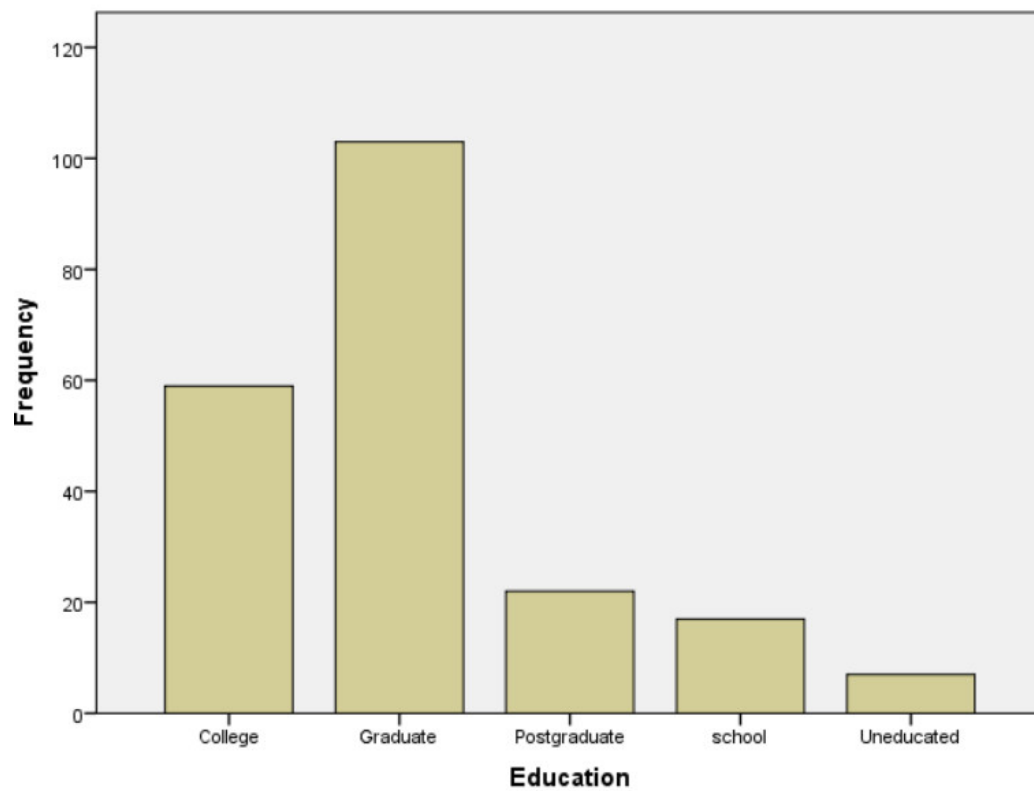

**Figure S2: Education-wise response of cancer Patients**

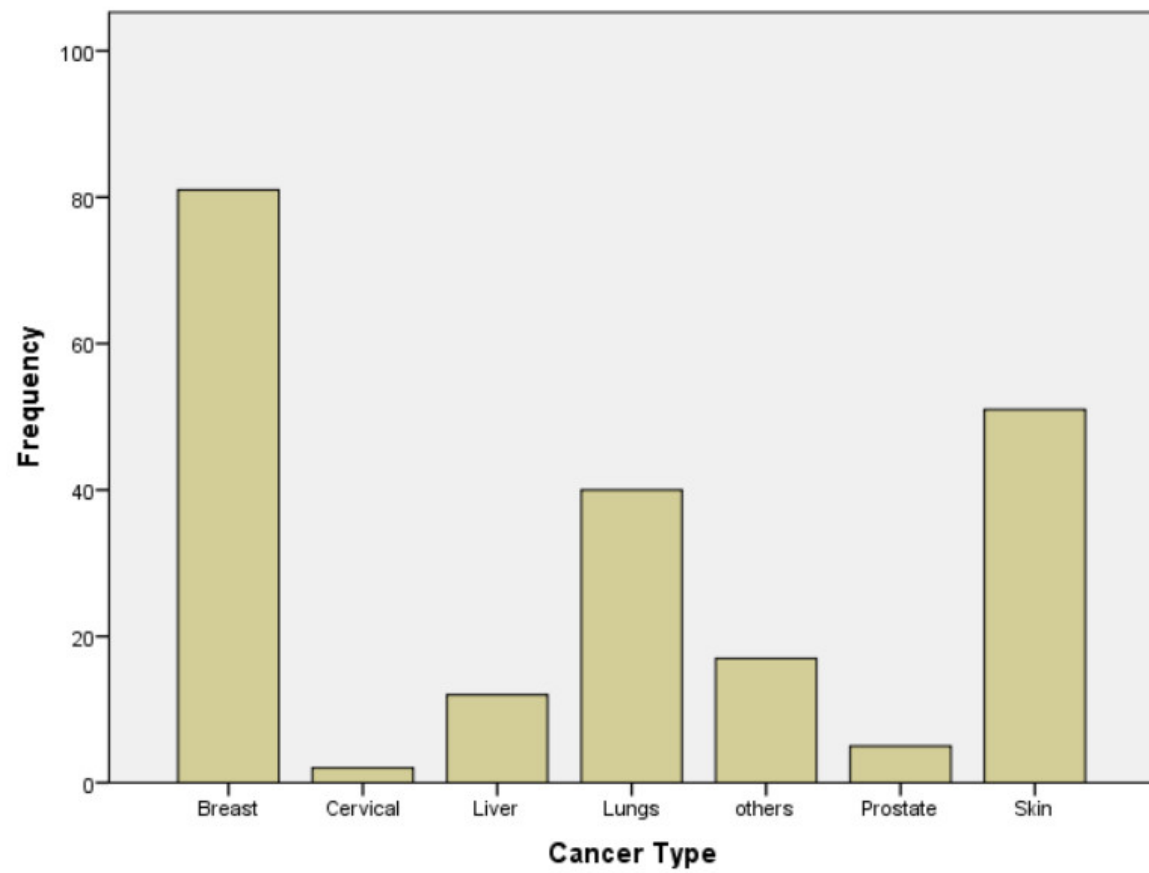

Figure S3: Cancer types wise response of cancer patients.

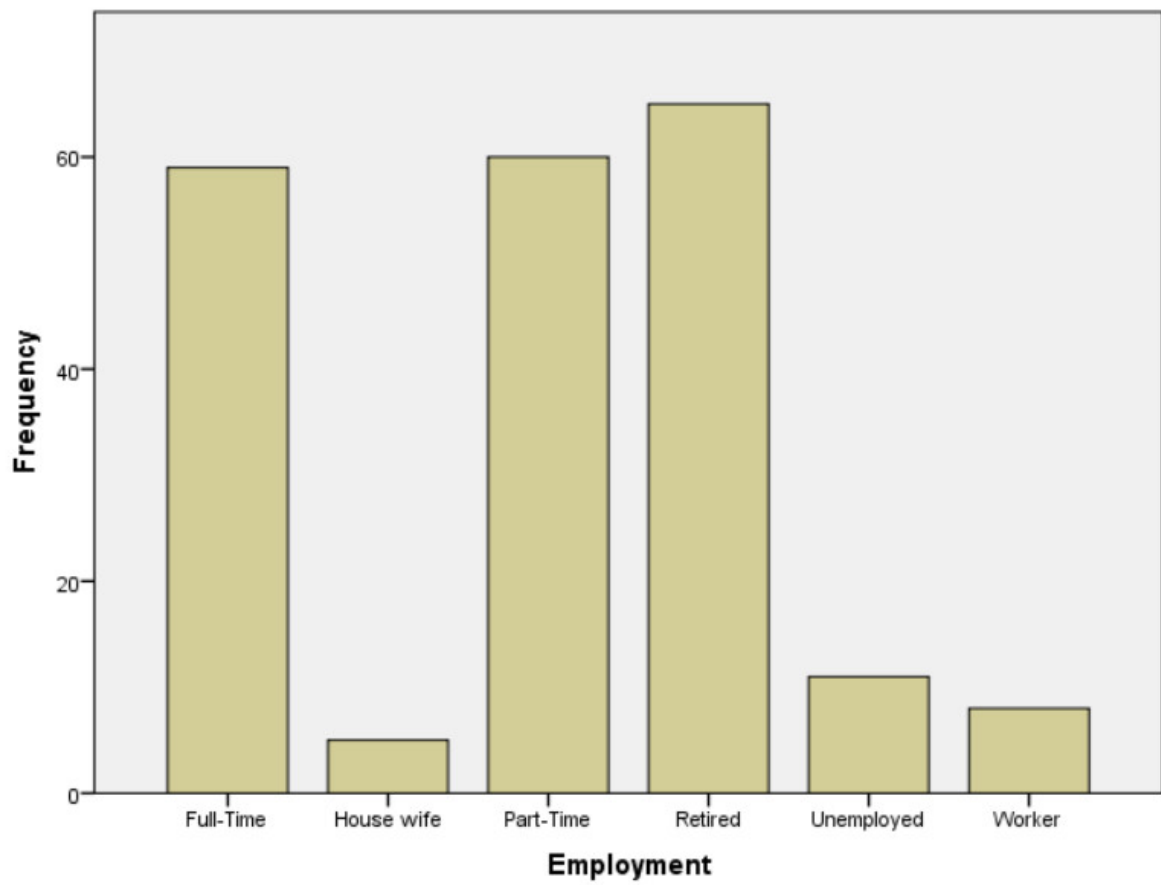

Figure S4:Employment wise response of cancer patients
